# Supplementary material for: Comparison between MICRO–CARD–FISH and 16S rRNA gene clone libraries to assess the active versus total bacterial community in the coastal Arctic
Source: PubMed Central journal article supplement (PMC3615173; doi:10.1111/1758-2229.12013), 2012-12-20
Supplement: emi40005-0272-SD2.pdf [file emi40005-0272-SD2.pdf]

Figure S2

a

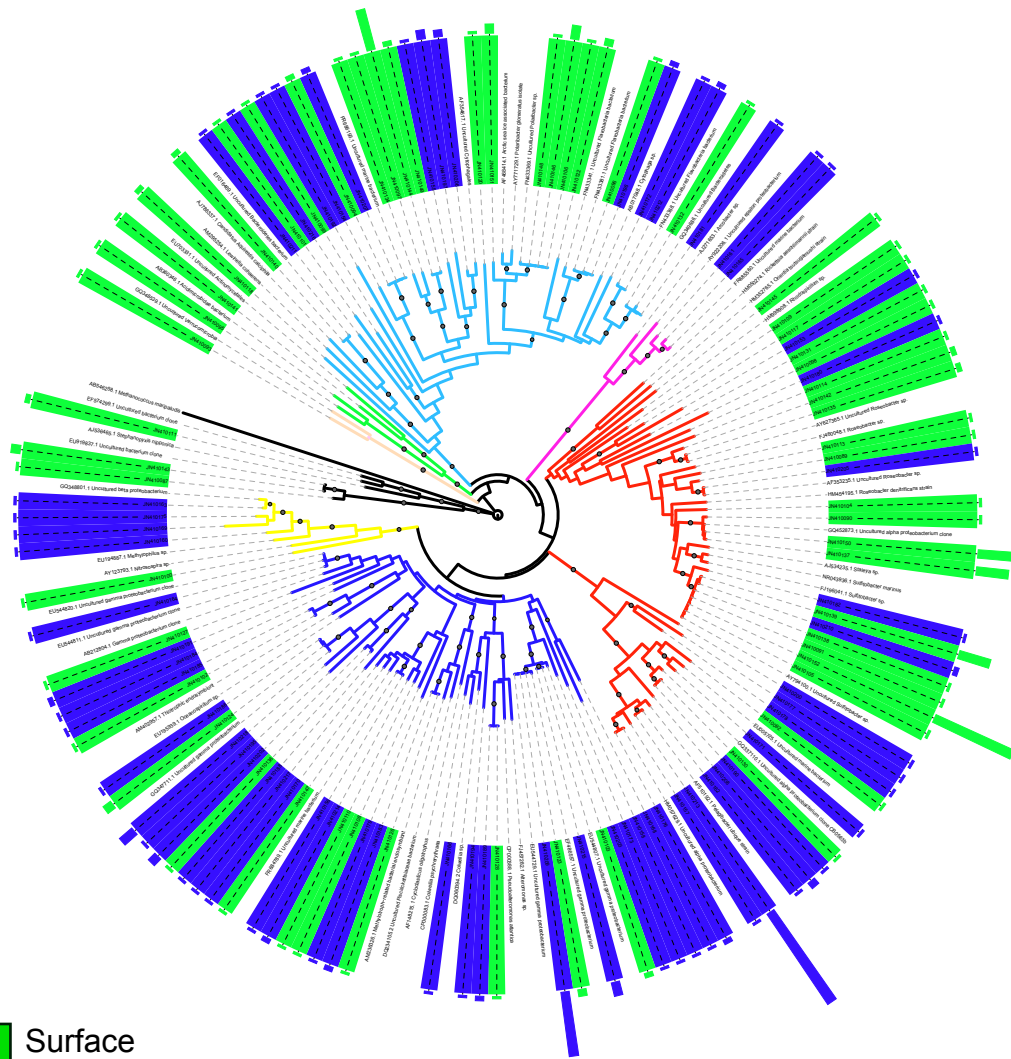

b

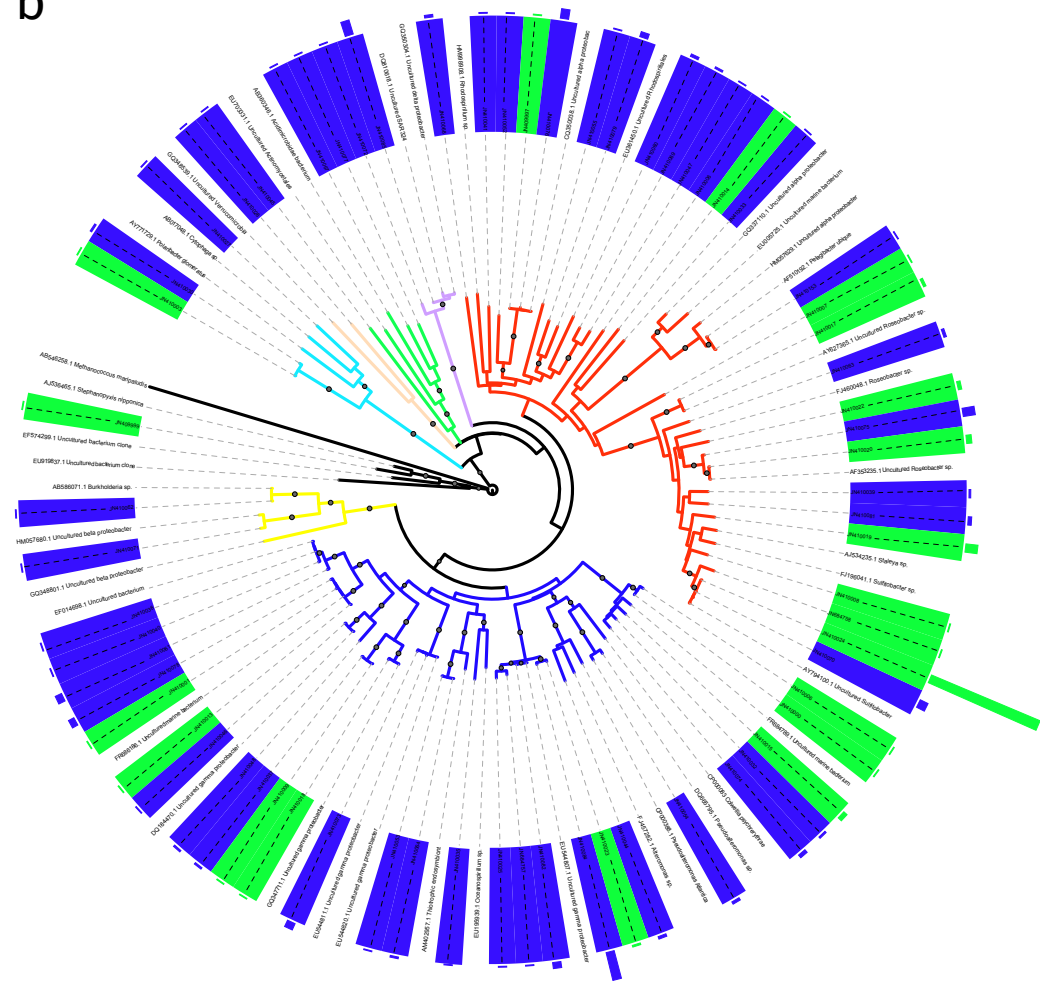

- Surface
- Deep
- Alphaproteobacteria
- Gammaproteobacteria
- Bacteroidetes
- Actinobacteria
- Betaproteobacteria
- Verrucomicrobia
- Epsilonproteobacteria
- Deltaproteobacteria
