# Supplementary material for: Comparison between MICRO–CARD–FISH and 16S rRNA gene clone libraries to assess the active versus total bacterial community in the coastal Arctic
Source: PubMed Central journal article supplement (PMC3615173; doi:10.1111/1758-2229.12013), 2012-12-20

Figure S4

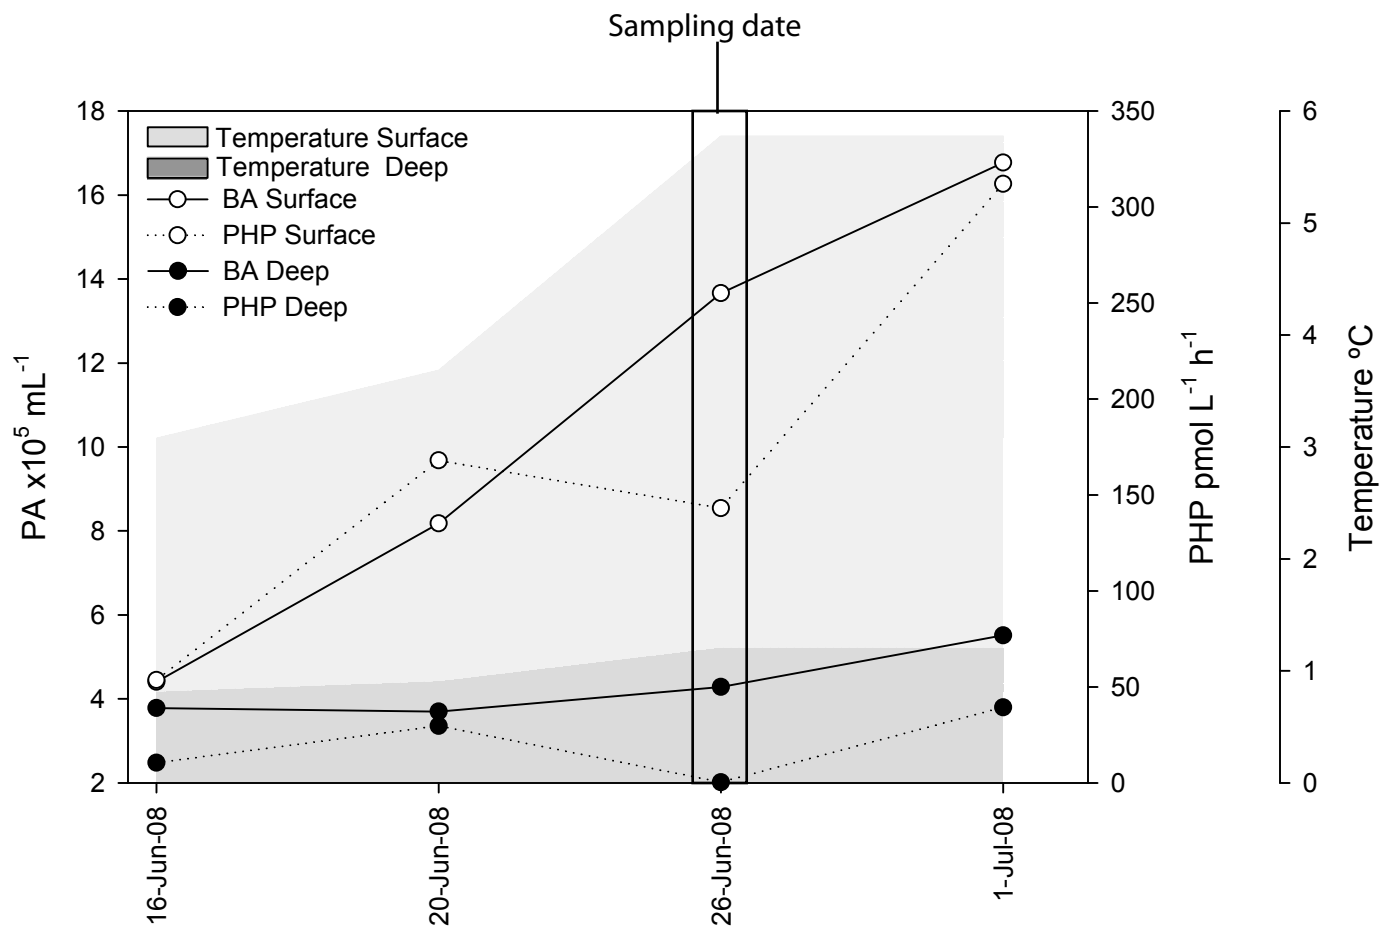

Supplement: emi40005-0272-SD4.pdf [file emi40005-0272-SD4.pdf]
